# Supplementary material
Source: PubMed Central journal article supplement (PMC5719873)
Supplement: NIHMS923292-supplement-Supplemental.pdf [file NIHMS923292-supplement-Supplemental.pdf]

## Supplementary Materials for

### **Therapeutic treatment of Marburg and Ravn virus infection in nonhuman primates with a human monoclonal antibody**

Chad E. Mire, Joan B. Geisbert, Viktoriya Borisevich, Karla A. Fenton, Krystle N. Agans, Andrew I. Flyak, Daniel J. Deer, Herta Steinkellner, Ognian Bohorov, Natasha Bohorova, Charles Goodman, Andrew Hiatt, Do H. Kim, Michael H. Pauly, Jesus Velasco, Kevin J. Whaley, James E. Crowe Jr., Larry Zeitlin,\* Thomas W. Geisbert\*

\*Corresponding author. Email: [twgeisbe@utmb.edu](mailto:twgeisbe@utmb.edu) (T.W.G.); [larry.zeitlin@mappbio.com](mailto:larry.zeitlin@mappbio.com) (L.Z.)

Published 5 April 2017, *Sci. Transl. Med.* **9**, eaai8711 (2017)

DOI: 10.1126/scitranslmed.aai8711

#### **The PDF file includes:**

- Fig. S1. Postexposure protection of guinea pigs infected with GPA MARV virus and treated 2 dpi with a single dose of mAb.
- Fig. S2. MARV antigen in NHPs treated or untreated with MR191-N on 5 and 8 dpi.
- Fig. S3. Neutralization sensitivity of virus inoculum and virus isolated from MARV Tx-5.
- Fig. S4. RAVV antigen in NHPs treated or untreated with MR191-N on 5 and 8 dpi.
- Table S1. Control or MR191-N–treated Marburg or Ravn virus–inoculated NHPs.
- Table S2. Single-nucleotide polymorphism changes from MARV deep sequencing data.

#### **Other Supplementary Material for this manuscript includes the following:**

(available at

[www.sciencetranslationalmedicine.org/cgi/content/full/9/384/eaai8711/DC1](http://www.sciencetranslationalmedicine.org/cgi/content/full/9/384/eaai8711/DC1))

Table S3 (Microsoft Excel format). Primary data.

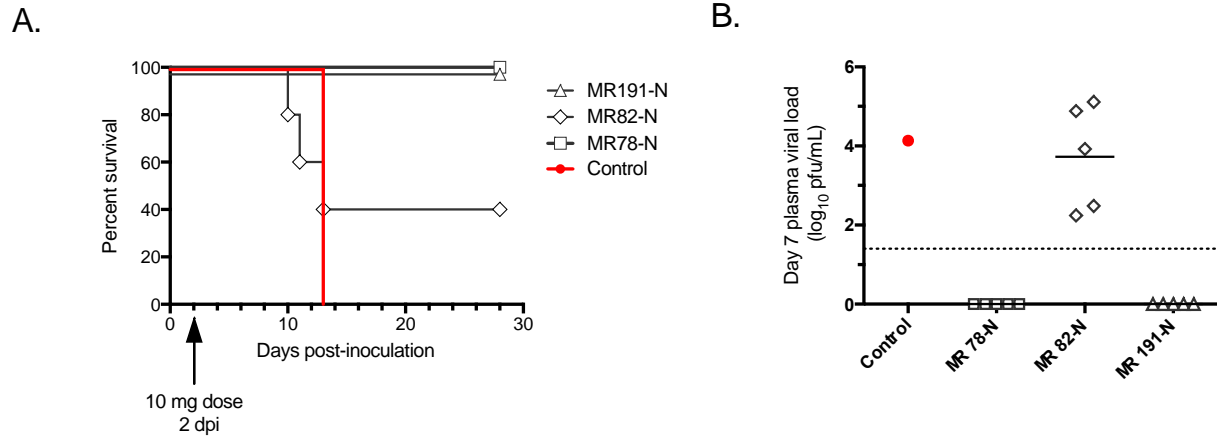

**Fig. S1. Postexposure protection of guinea pigs infected with GPA MARV virus and treated 2 dpi with a single dose of mAb.** Guinea pigs received 1,000 pfu of GPA MARV IP and a 10 mg dose of mAb IP 2 dpi (n=5 per treatment group; n=1 for PBS control). **(A)** Kaplan-Meier survival curves. MR78-N and MR191-N were significantly more protective than MR82-N (P<0.05 by Mantel-Cox test). **(B)** Plasma viral load 7 dpi, as determined by plaque assay. Limit of detection ( 25 pfu/mL) is indicated by a dotted line.

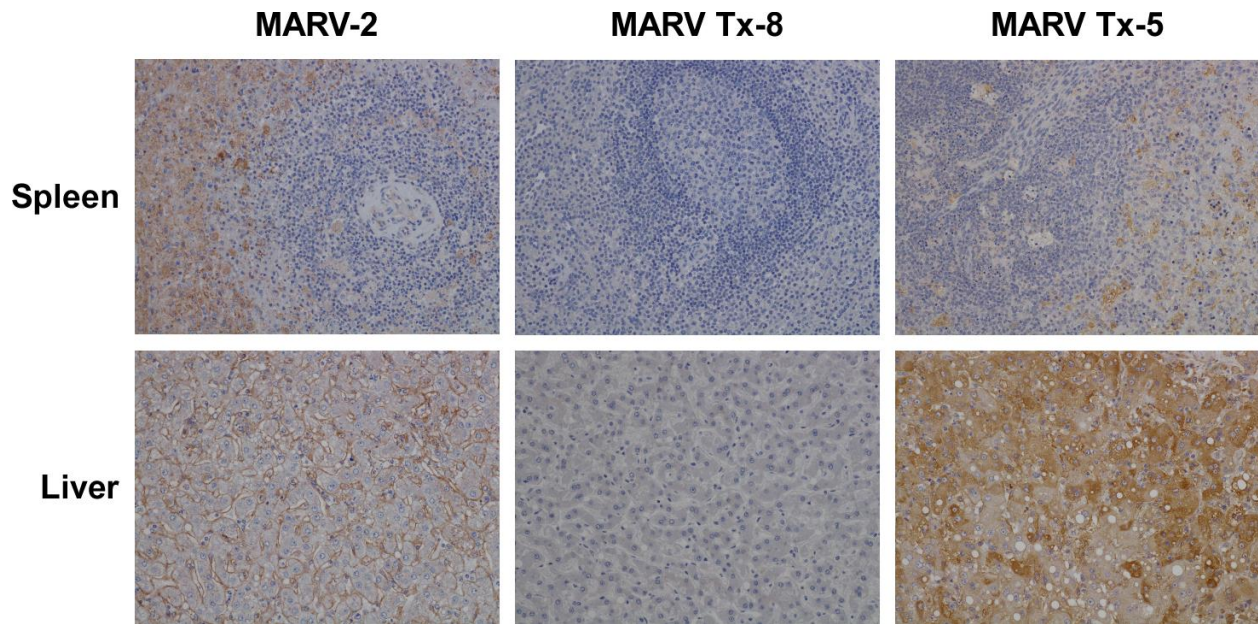

**Fig. S2. MARV antigen in NHPs treated or untreated with MR191-N on 5 and 8 dpi.** Top row. MARV immunolabeling of dendriform mononuclear cells in red and white pulp. Bottom row. MARV immunolabeling of sinusoidal lining and Kupffer cells. MARV-2 was not treated with mAb and succumbed to infection, MARV Tx-8 was treated with mAb and survived, and MARV Tx-5 was treated with mAb but succumbed. Labeling indicative of the presence of MARV antigen is observed for MARV-2 and MARV Tx-5 but not for MARV Tx-8.

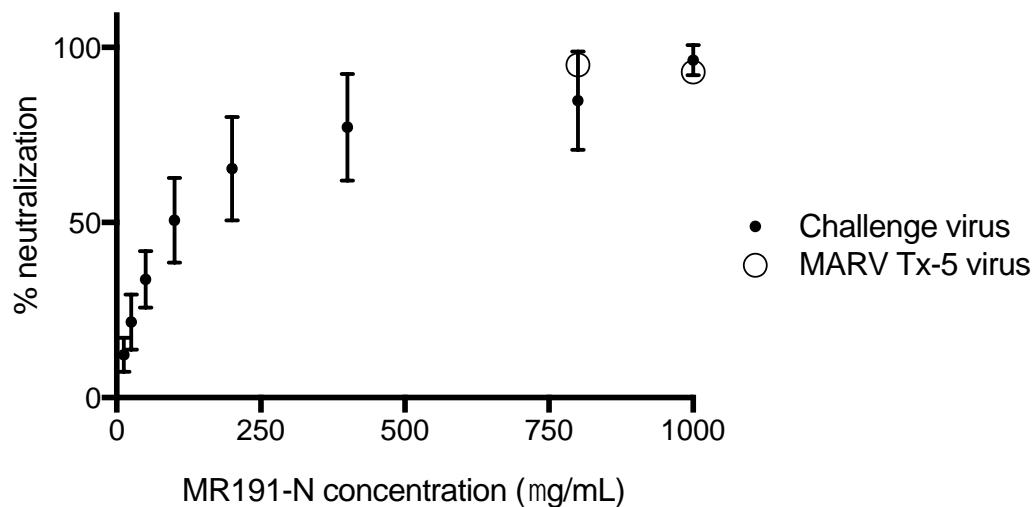

**Fig. S3. Neutralization sensitivity of virus inoculum and virus isolated from MARV Tx-5.** Virus isolated from a 15 dpi sample from the treated animal that succumbed to disease (MARV

Tx-5) was tested for its susceptibility to neutralization by 800 and 1,000  $\mu\text{g}/\text{mL}$  of MR191-N (n=1), concentrations spanning the  $\text{IC}_{90}$  for wildtype virus. Neutralization of the original viral stock by MR191-N is plotted for comparison. Error bars denote standard deviation (n=5).

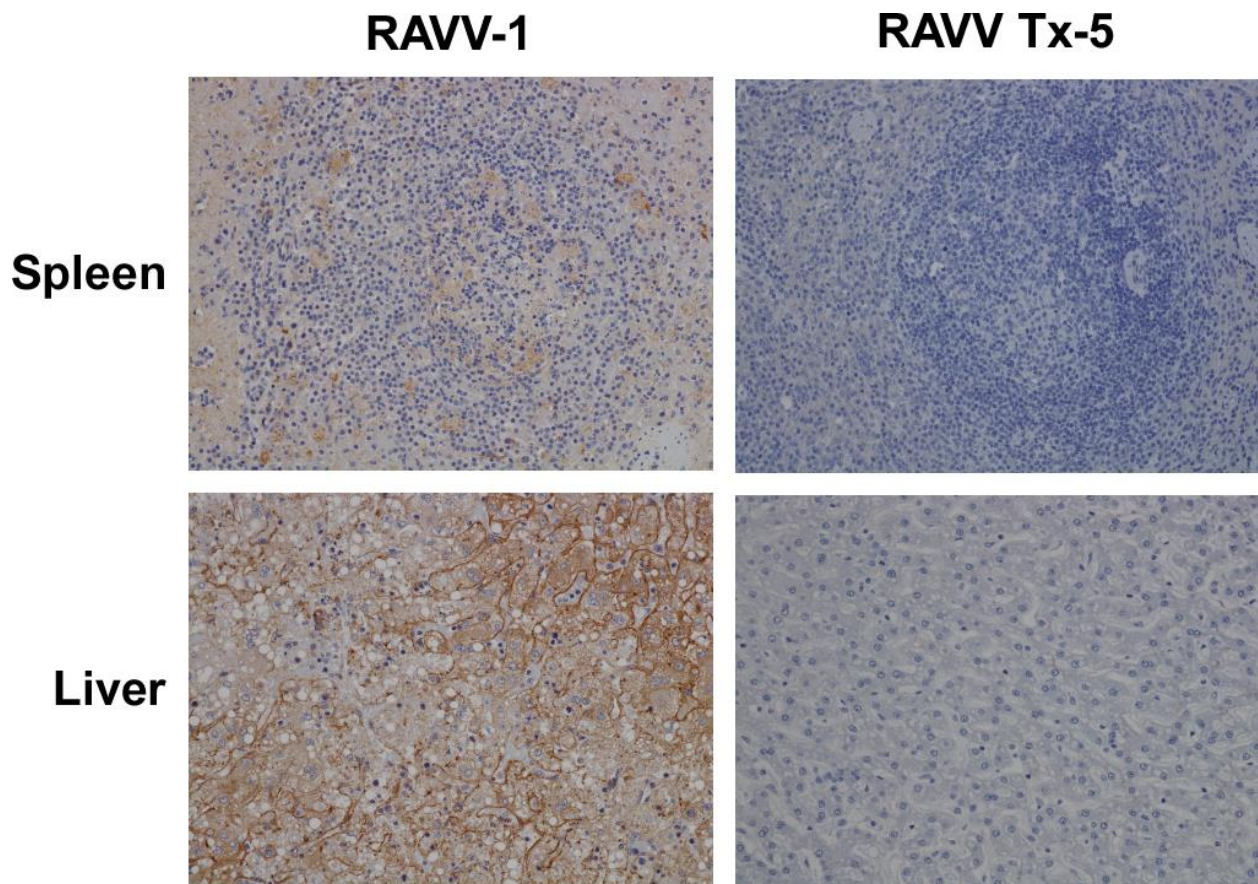

**Fig. S4. RAVV antigen in NHPs treated or untreated with MR191-N on 5 and 8 dpi.** Top row. RAVV immunolabeling of dendriform mononuclear cells in red and white pulp. Bottom row. RAVV immunolabeling of sinusoidal lining and Kupffer cells. RAVV-1 was not treated with mAb and succumbed to infection while RAVV Tx-5 was treated with mAb and survived. Labeling indicative of the presence of RAVV antigen is observed for RAVV-1 but not for RAVV Tx-5.

**Table S1. Control or MR191-N–treated Marburg or Ravn virus–inoculated NHPs.**

| Subject Identifier | Sex | Group   | Clinical illness                                                                                                                                                                   | Clinical pathology                                                                                                                                                                                                                                                                                                                                                          |
|--------------------|-----|---------|------------------------------------------------------------------------------------------------------------------------------------------------------------------------------------|-----------------------------------------------------------------------------------------------------------------------------------------------------------------------------------------------------------------------------------------------------------------------------------------------------------------------------------------------------------------------------|
| MARV-1             | F   | No Tx   | Fever (D7); mild depression (D7); moderate depression (D8); lethargy (D7-8); loss of appetite (D6-8); mild rash (D7-8); Animal euthanized in pm on D8.                             | Lymphopenia (D7); thrombocytopenia (D7, D8); granulocytosis (D8); hypoalbuminemia (D8); >5-fold increase ALT (D7, D8); >15-fold increase in AST (D7, D8); >5-fold increase in CRP (D7, D8).                                                                                                                                                                                 |
| MARV-2             | F   | No Tx   | Mild depression (D7); lethargy (D7-8); loss of appetite (D6-8); mild rash (D7-8). Animal expired in am on D8.                                                                      | Lymphopenia (D5); thrombocytopenia (D5); hypoalbuminemia (D8); >10-fold increase in ALT (D8); >10-fold increase in AST (D5, D8), >4-fold increase in AST (D10); >4-fold increase in BUN (D8); >5-fold increase in CRP (D5, D8).                                                                                                                                             |
| MARV Tx-1          | F   | Day 4/7 | Loss of appetite (D5-12).                                                                                                                                                          | Lymphopenia (D7); thrombocytopenia (D7, D10); leukocytosis (D10); granulocytosis (D4, D7, D10, D14, D21, D28); >10-fold increase ALT (D7, D10), >3-fold increase in ALT (D14); >10-fold increase in AST (D7), >4-fold increase in AST (D10); >4-fold increase in CRP (D4), >2-fold increase in CRP (D7).                                                                    |
| MARV Tx-2          | F   | Day 4/7 | Fever (D7); loss of appetite (D9).                                                                                                                                                 | Lymphopenia (D7); leukocytosis (D10, D14); granulocytosis (D4); >4-fold increase ALT (D7, D10); >5-fold increase AST (D7); >2-fold increase CRP (D4).                                                                                                                                                                                                                       |
| MARV Tx-3          | M   | Day 4/7 | Fever (D4, D7); loss of appetite (D7-D11).                                                                                                                                         | Lymphopenia (D4, D7); thrombocytopenia (D7, D10); leukocytosis (D14), granulocytosis (D4, D14); >15-fold increase ALT (D7), >5-fold increase ALT (D10, D14), >2-fold increase ALT (D21); >10-fold increase AST (D7, D10); >10-fold increase CRP (D4), >5-fold increase CRP (D7)                                                                                             |
| MARV Tx-4          | M   | Day 5/8 | Fever (D5, D8).                                                                                                                                                                    | Lymphopenia (D5, D8); leukocytosis (D11); >10-fold increase ALT (D8, D11), >4-fold increase in ALT (D14); >15-fold increase in AST (D8); >6-fold increase in CRP (D5, D8).                                                                                                                                                                                                  |
| MARV Tx-5          | M   | Day 5/8 | Fever (D5, D8); mildly depressed (D10, D14); depressed (D15); lethargy (D15); loss of appetite (D6-15); severe rash (D15); facial edema (D12-D15). Animal euthanized in am on D15. | Lymphopenia (D8); thrombocytopenia (D5, D8, D11, D14, D15); leukocytosis (D10); granulocytosis (D5, D8, D11); hypoalbuminemia (D11, D14, D15); >15-fold increase ALT (D8, D11, D14, D15), >2-fold increase in ALT (D5); >10-fold increase in AST (D8, D11, D14, D15), >5-fold increase in AST (D5); >3-fold increase BUN (D15); >4-fold increase in CRP (D5, D8, D14, D15). |
| MARV Tx-6          | M   | Day 5/8 | Fever (D8); mild depression (D8, D10); loss of appetite (D6-D13).                                                                                                                  | Lymphopenia (D5, D8); thrombocytopenia (D8, D11); leukocytosis (D14, D21, D28); granulocytosis (D5, D11, D14, D28); hypoalbuminemia (D11, D14); >10-fold increase ALT (D8), >5-fold increase in ALT (D11); >5-fold increase in AST (D8, D11), >2-fold increase in AST (D5); >4-fold increase in CRP (D5, D8), >2-fold increase in CRP (D28).                                |
| MARV Tx-7          | F   | Day 5/8 | None.                                                                                                                                                                              | Lymphopenia (D5, D8); thrombocytopenia (D8); leukocytosis (D11, D14); >10-fold increase ALT (D8, D11), >5-fold increase in ALT (D14); >10-fold increase in AST (D8), >2-fold increase in AST (D11); >4-fold increase in CRP (D8), >3-fold increase in CRP (D5).                                                                                                             |

|           |   |         |                                       |                                                                                                                                                                                                                                                                                                           |
|-----------|---|---------|---------------------------------------|-----------------------------------------------------------------------------------------------------------------------------------------------------------------------------------------------------------------------------------------------------------------------------------------------------------|
| MARV Tx-8 | F | Day 5/8 | Fever (D5); loss of appetite (D6-12). | Lymphopenia (D5, D8); thrombocytopenia (D8, D11); leukocytosis (D11, D14); hypoalbuminemia (D11); >15-fold increase ALT (D8, D11), >2-fold increase in ALT (D14, D21); >10-fold increase in AST (D8), >3-fold increase in AST (D5, D11); >4-fold increase in CRP (D5, D8), >2-fold increase in CRP (D11). |
|-----------|---|---------|---------------------------------------|-----------------------------------------------------------------------------------------------------------------------------------------------------------------------------------------------------------------------------------------------------------------------------------------------------------|

|        |   |       |                                                                                                                                                          |                                                                                                                                                                     |
|--------|---|-------|----------------------------------------------------------------------------------------------------------------------------------------------------------|---------------------------------------------------------------------------------------------------------------------------------------------------------------------|
| RAVV-1 | F | No Tx | Fever (D8); moderate depression (D8-10); lethargy (D8-10); loss of appetite (D7-10); mild rash (D8); moderate rash (D9-10). Animal expired in am on D10. | Lymphopenia (D5); thrombocytopenia (D8); >15-fold increase ALT (D8); >15-fold increase in AST (D8), >2-fold increase in AST (D5); >2-fold increase in CRP (D5, D8). |
|--------|---|-------|----------------------------------------------------------------------------------------------------------------------------------------------------------|---------------------------------------------------------------------------------------------------------------------------------------------------------------------|

|           |   |         |       |                                                                                                                            |
|-----------|---|---------|-------|----------------------------------------------------------------------------------------------------------------------------|
| RAVV Tx-1 | M | Day 5/8 | None. | Lymphopenia (D5, D8); leukocytosis (D11); granulocytosis (D5); >6-fold increase in CRP (D5), >2-fold increase in CRP (D8). |
|-----------|---|---------|-------|----------------------------------------------------------------------------------------------------------------------------|

|           |   |         |             |                                                                                                                                                                                                                                                                                     |
|-----------|---|---------|-------------|-------------------------------------------------------------------------------------------------------------------------------------------------------------------------------------------------------------------------------------------------------------------------------------|
| RAVV Tx-2 | M | Day 5/8 | Fever (D5). | Lymphopenia (D5, D8); thrombocytopenia (D8); leukocytosis (D11); granulocytosis (D5, D11); >10-fold increase ALT (D8), >3-fold increase in ALT (D11, D14); >5-fold increase in AST (D8), >2-fold increase in AST (D11); >6-fold increase in CRP (D5), >2-fold increase in CRP (D8). |
|-----------|---|---------|-------------|-------------------------------------------------------------------------------------------------------------------------------------------------------------------------------------------------------------------------------------------------------------------------------------|

|           |   |         |             |                                                                                                                                                                                                                                                 |
|-----------|---|---------|-------------|-------------------------------------------------------------------------------------------------------------------------------------------------------------------------------------------------------------------------------------------------|
| RAVV Tx-3 | M | Day 5/8 | Fever (D5). | Lymphopenia (D5, D8); thrombocytopenia (D8); leukocytosis (D11); granulocytosis (D5); >5-fold increase ALT (D8), >2-fold increase in ALT (D11, D14); >4-fold increase in AST (D8), >2-fold increase in AST (D11); >5-fold increase in CRP (D5). |
|-----------|---|---------|-------------|-------------------------------------------------------------------------------------------------------------------------------------------------------------------------------------------------------------------------------------------------|

|           |   |         |             |                                                                              |
|-----------|---|---------|-------------|------------------------------------------------------------------------------|
| RAVV Tx-4 | F | Day 5/8 | Fever (D5). | Leukocytosis (D11); >3-fold increase ALT (D8); >6-fold increase in CRP (D5). |
|-----------|---|---------|-------------|------------------------------------------------------------------------------|

|           |   |         |       |                                                                                                                                                                                                |
|-----------|---|---------|-------|------------------------------------------------------------------------------------------------------------------------------------------------------------------------------------------------|
| RAVV Tx-5 | F | Day 5/8 | None. | Lymphopenia (D5); leukocytosis (D11, D14); >5-fold increase ALT (D8), >2-fold increase in ALT (D11); >3-fold increase in AST (D8); >4-fold increase in CRP (D5), >2-fold increase in CRP (D8). |
|-----------|---|---------|-------|------------------------------------------------------------------------------------------------------------------------------------------------------------------------------------------------|

<sup>a</sup> Days after MARV or RAVV inoculation are in parentheses. Fever is defined as a body temperature more than 2.5 °F over baseline or at least 1.5 °F over baseline and  $\geq 103.5$  °F. Mild rash: focal areas of petechiae covering less than 10% of the skin; Moderate rash: areas of petechiae covering between 10% and 40% of the skin; severe rash: areas of petechiae and/or echymosis covering more than 40% of the skin. Lymphopenia and thrombocytopenia are defined by a  $\geq 35\%$  drop in numbers of lymphocytes and platelets, respectively. Leukocytosis and granulocytosis are defined by  $\geq 35\%$  increase in numbers of white blood cells. Hypoalbuminemia is defined by a  $\geq 35\%$  decrease in levels of albumin. (ALP) alkaline phosphatase, (ALT) Alanine aminotransferase, (AST) aspartate aminotransferase, (GGT) gamma glutamyltransferase, (BUN) blood urea nitrogen, (CRE) creatinine, (CRP) C-reactive protein

**Table S2. Single-nucleotide polymorphism changes from MARV deep sequencing data.**

| MARV <sup>a</sup>             |            |                       |             |               |             |          |            |             |          |           |                   |
|-------------------------------|------------|-----------------------|-------------|---------------|-------------|----------|------------|-------------|----------|-----------|-------------------|
| Ref Pos                       | Type       | Ref Base <sup>b</sup> | Called Base | SNP %         | Depth       | A Cnt    | C Cnt      | G Cnt       | U Cnt    | Gene      | Change            |
| 124                           | SNP        | A                     | U           | 26.70%        | 285         | -        | 0          | 0           | 76       | NP        | L7F               |
| 696                           | SNP        | A                     | G           | 6.10%         | 3928        | -        | 49         | 238         | 69       | NP        | H198R             |
| 2834                          | SNP        | A                     | G           | 11.50%        | 287         | -        | 0          | 33          | 0        |           | Non-coding        |
| 7329                          | SNP        | U                     | C           | 7.30%         | 123         | 0        | 9          | 0           | -        | GP        | Silent            |
| 8433                          | SNP        | A                     | G           | 9.00%         | 4638        | -        | 0          | 419         | 0        |           | Non-coding        |
| 14547                         | SNP        | C                     | U           | 6.50%         | 1428        | 0        | -          | 17          | 93       | L         | Silent            |
| 18679                         | SNP        | A                     | U           | 5.20%         | 2240        | -        | 1          | 6           | 117      |           | Non-coding        |
| MARV Tx-5 15 dpi <sup>c</sup> |            |                       |             |               |             |          |            |             |          |           |                   |
| 35                            | SNP        | A                     | G           | 35.50%        | 124         | -        | 1          | 44          | 1        |           | Non-coding        |
| 38                            | SNP        | A                     | U           | 25.60%        | 152         | -        | 0          | 0           | 32       |           | Non-coding        |
| 124                           | SNP        | A                     | U           | 28.70%        | 286         | -        | 0          | 0           | 82       | NP        | L7F               |
| 127                           | SNP        | A                     | G           | 5.80%         | 346         | -        | 0          | 20          | 6        | NP        | Silent            |
| 696                           | SNP        | A                     | G           | 6.50%         | 3984        | -        | 28         | 257         | 39       | NP        | H198R             |
| 2590                          | SNP        | U                     | C           | 9.50%         | 1847        | 0        | 176        | 8           | -        |           | Non-coding        |
| 2598                          | SNP        | U                     | C           | 9.20%         | 1985        | 0        | 182        | 0           | -        |           | Non-coding        |
| 2640                          | SNP        | U                     | C           | 9.20%         | 1869        | 0        | 172        | 0           | -        |           | Non-coding        |
| 2643                          | SNP        | U                     | C           | 9.40%         | 1838        | 0        | 172        | 0           | -        |           | Non-coding        |
| 2663                          | SNP        | U                     | C           | 10.40%        | 1780        | 1        | 186        | 1           | -        |           | Non-coding        |
| 2724                          | SNP        | U                     | C           | 10.90%        | 2377        | 0        | 259        | 0           | -        |           | Non-coding        |
| <b>2834</b>                   | <b>SNP</b> | <b>A</b>              | <b>G</b>    | <b>46.90%</b> | <b>3631</b> | -        | <b>0</b>   | <b>1702</b> | <b>0</b> |           | <b>Non-coding</b> |
| 2836                          | SNP        | U                     | C           | 6.50%         | 3672        | 10       | 238        | 0           | -        |           | Non-coding        |
| 3400                          | SNP        | A                     | U           | 5.40%         | 3543        | -        | 0          | 0           | 192      | VP35      | Silent            |
| 4522                          | SNP        | G                     | U           | 5.90%         | 778         | 0        | 0          | -           | 46       |           | Non-coding        |
| <u>6891</u>                   | <u>SNP</u> | <u>U</u>              | <u>C</u>    | <u>6.80%</u>  | <u>1770</u> | <u>2</u> | <u>121</u> | <u>0</u>    | <u>-</u> | <u>GP</u> | <u>Silent</u>     |
| 7329                          | SNP        | U                     | C           | 6.60%         | 500         | 0        | 33         | 0           | -        | GP        | Silent            |

|       |     |   |   |        |      |     |     |      |     |   |            |
|-------|-----|---|---|--------|------|-----|-----|------|-----|---|------------|
| 8860  | SNP | A | G | 5.00%  | 2225 | -   | 24  | 112  | 22  |   | Non-coding |
| 10203 | SNP | A | G | 7.70%  | 3174 | -   | 26  | 245  | 48  |   | Non-coding |
| 14539 | SNP | G | U | 17.80% | 1700 | 0   | 0   | -    | 303 | L | C1026F     |
| 14547 | SNP | C | U | 7.10%  | 2525 | 4   | -   | 22   | 180 | L | Silent     |
| 14833 | SNP | C | U | 7.30%  | 6280 | 20  | -   | 139  | 460 | L | A1124V     |
| 14834 | SNP | A | G | 9.30%  | 6260 | -   | 279 | 585  | 176 | L | Silent     |
| 15768 | SNP | A | U | 16.30% | 5248 | -   | 0   | 5    | 856 | L | S1436C     |
| 15775 | SNP | A | G | 15.30% | 7049 | -   | 59  | 1082 | 95  | L | N1438S     |
| 15780 | SNP | A | G | 9.90%  | 7959 | -   | 164 | 786  | 232 | L | S1440G     |
| 16206 | SNP | C | U | 5.70%  | 1431 | 0   | -   | 0    | 82  | L | L1582F     |
| 18679 | SNP | A | U | 13.30% | 2884 | -   | 0   | 1    | 385 |   | Non-coding |
| 18684 | SNP | A | G | 9.70%  | 3366 | -   | 5   | 328  | 51  |   | Non-coding |
| 18961 | SNP | C | A | 5.90%  | 4477 | 264 | -   | 0    | 3   |   | Non-coding |
| 19084 | SNP | C | A | 5.30%  | 225  | 12  | -   | 0    | 0   |   | Non-coding |

SNP, single nucleotide polymorphism; SNP%, percentage of reads containing SNP, Ref Pos; Nucleotide position in reference genome; Depth, number of reads over base; Cnt, number counted.

<sup>a</sup> MARV passage 2 seed stock used for inoculations presented in this study.

<sup>b</sup>The MARV reference strain used is GenBank Accession number DQ447653.

<sup>c</sup> Virus isolate from MARV Tx-5 15 dpi serum.

Bold face type highlights a notable change in population of genomes.

Underlined type highlights the only change in GP sequence compared to the MARV passage 2 seed stock.
